# Supplementary material for: Anti-inflammatory and anti-oxidant mechanisms of an MMP-8 inhibitor in lipoteichoic acid-stimulated rat primary astrocytes: involvement of NF-κB, Nrf2, and PPAR-γ signaling pathways
Source: PubMed Central journal article supplement (PMC6260848; doi:10.1186/s12974-018-1363-6), 2018-11-23
Supplement: 12974_2018_1363_MOESM1_ESM.pdf [file 12974_2018_1363_MOESM1_ESM.pdf]

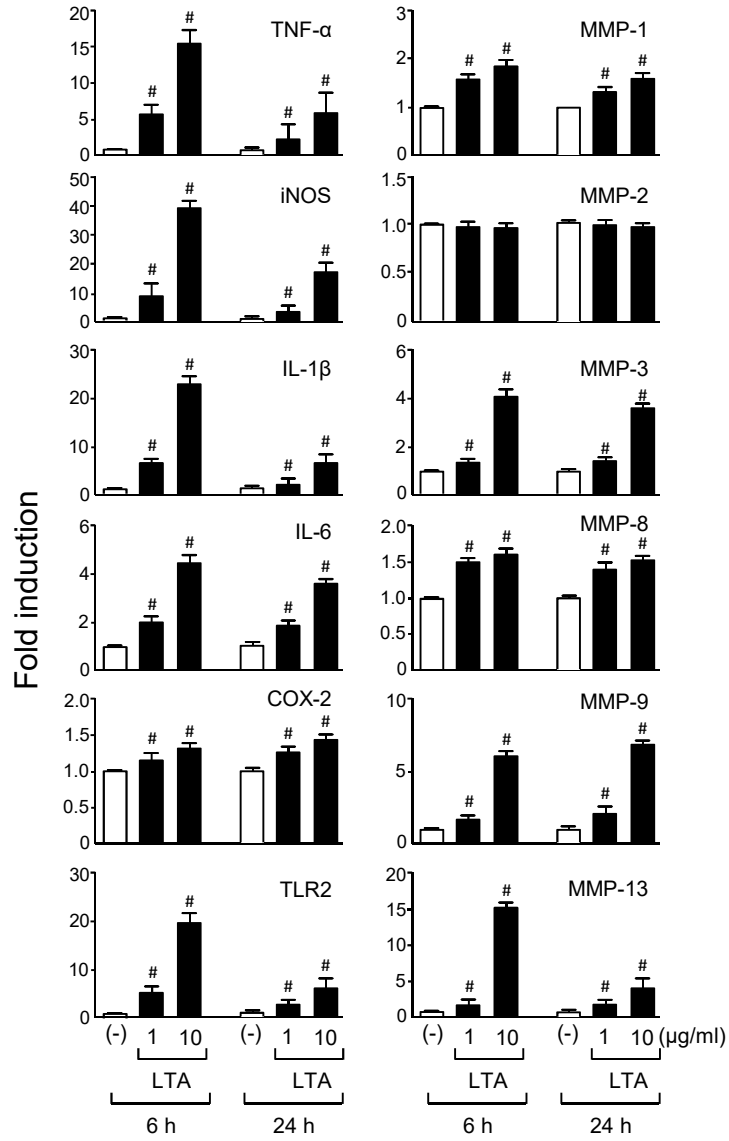

**Figure S1: Quantitative real time PCR (RT-qPCR) data showing the expressions of iNOS, COX-2, cytokines, TLR2, and MMPs in LTA-simulated astrocytes.** The data are the mean  $\pm$  S.E.M. of three independent experiments.  $\#P < 0.05$ , vs. control samples.
